# Supplementary material
Source: PubMed Central journal article supplement (PMC10575759)
Supplement: NIHMS1934757-supplement-Supplemental_Figure_Legends.pdf [file NIHMS1934757-supplement-Supplemental_Figure_Legends.pdf]

1 **Figure S1. Effect of Notch inhibitor CB103 on human well-differentiated**  
2 **liposarcoma (WDLPS) cell lines.** Representative dose-response curves of WDLPS-  
3 80.2 (A) and WDLPS-135 (B) cell lines in varying concentrations of CB103, and the  
4 corresponding IC<sub>50</sub> values (n = 6). Data are presented as mean ± SD, \*P < 0.05, \*\*P <  
5 0.001.

6  
7 **Figure S2. Effect of Notch inhibitors on apoptosis of liposarcoma cell lines. A.**  
8 TUNEL (terminal deoxynucleotidyl transferase dUTP nick end labeling) staining to  
9 assess cell apoptosis in mouse liposarcoma cell line mLPS1 and human DDLPS cell  
10 line LPS246 after treat with Notch signaling inhibitors CB103 for 20 μM. The mLPS1  
11 cells treat IMR1 for 20 μM and LPS246 cells treat IMR1 for 4 μM. **B.** TUNEL staining  
12 to assess cell apoptosis in mLPS1 and mLPS1-ΔNICD cell lines. TUNEL signal is  
13 shown in red and cell nuclei is stained in blue by DAPI. Scale bars, 50 μm.

14  
15 **Figure S3. Effect of Notch inhibitor CB103 on liposarcoma growth *in vivo*. A.**  
16 Experimental design for subcutaneous transplantation of mLPS1 cells into the flanks  
17 of NRG mice. CB103 (40mg/kg/day) was intra-peritoneally injected 15 days later when  
18 palpable tumors were detectable, daily injections of vehicle or CB103 were  
19 administrated from day 15 to day 27 (n = 5 mice/group, one mouse in the CB-103  
20 group died from unknown cause during treatment). **B.** Photographic images of NSG  
21 mice carrying subcutaneously xenografts of mLPS1 tumors. Note that skin necros  
22 (reflected by the dark purple color) is more apparent in the vehicle group. **C.** Tumor  
23 growth curve of vehicle and CB103 groups, based caliper measurement of tumor width  
24 and length. **D.** Tumor morphology after dissected from mice at the d28 end point. **E.**  
25 average weight of the tumors shown in D.

26  
27 **Figure S4. Notch activation suppresses mLPS1 cell differentiation into**  
28 **adipocytes. A.** RT-qPCR analysis showing expression of mature adipocyte marker  
29 genes in mLPS1 and mLPS1<sup>ΔNICD</sup> cells. **B.** Fluorescent staining images of lipid droplets  
30 (labeled with BODIPY in green as indicator of adipogenic differentiation) in mLPS1 and  
31 mLPS1<sup>ΔNICD</sup> cells after treated with adipocyte differentiation medium, visualized by  
32 immunofluorescence microscopy. Scale bars, 50 μm. Nuclei were counterstained with  
33 DAPI (blue). **C.** RT-qPCR analysis showing relative levels of mature adipocyte markers  
34 in mLPS1 cells at 24 h after expose to adipocyte differentiation medium. **D.** RT-qPCR  
35 analysis of mature adipocyte marker expression levels in mLPS1<sup>ΔNICD</sup> cells at 24 h after

36 expose to adipocyte differentiation medium. Data are represented as mean  $\pm$  SD. \*P  
37 < 0.05, \*\*P < 0.001. n.s., not significant.

38

39 **Figure S5. Gene expression in response to abrogation of NICD<sup>OE</sup> in mLPS1 cells.**

40 **A** and **B**. RT-qPCR analysis *Notch1* and *Ppargc1a* expression in mLPS1 and  
41 mLPS1 <sup>$\Delta$ NICD</sup> cells. **C**. Heatmap visualization of the top 20 co-upregulated and 20 co-  
42 downregulated genes in mLPS1 <sup>$\Delta$ NICD</sup> relative to mLPS1 cells. **D**. RT-qPCR analysis of  
43 *PPARGC1 $\alpha$*  mRNA expression level in human liposarcoma cell line LPS246 treat with  
44 Notch inhibitor IMR1 and CB103. Data are represented as mean  $\pm$  SD. \*P < 0.05, \*\*P  
45 < 0.001. n.s., not significant.

46

47 **Figure S6. Effects of PGC1 $\alpha$  expression and activation on migration and**

48 **differentiation of mLPS1 liposarcoma cells. A.** Wound healing assay to analyze cell  
49 migration of mLPS1 and PGC1 $\alpha$  overexpressing mLPS1 cells. Areas between red lines  
50 were scraped and cell migration into the scraped area were subsequently analyzed at  
51 6 h and 20 h. Scale bars, 100  $\mu$ m. **B.** Relative wound area (area without cells) of  
52 mLPS1 cell migration (n = 3). **C.** Immunofluorescent staining of lipid droplets (Bodipy  
53 labeling) in mLPS1 cells treat with adipocyte differentiation medium with or without  
54 PGC1 $\alpha$  agonist Forskolin. Cell nuclei were counterstained with DAPI. Data are  
55 presented as mean  $\pm$  SD, \*P < 0.05, \*\*P < 0.001.

56

57
