# Supplementary material
Source: PubMed Central journal article supplement (PMC10575759)
Supplement: NIHMS1934757-supplement-Table_S1.pdf [file NIHMS1934757-supplement-Table_S1.pdf]

**Supplementary Table 1. Oligonucleotide sequences for RT-qPCR.**

| Name                 | Sequence (5'-3')         | Product length(bp) |
|----------------------|--------------------------|--------------------|
| <b>Human primers</b> |                          |                    |
| 18S-qPCR-F           | AGTCCCTGCCCTTTGTACACA    |                    |
| 18S-qPCR-R           | CGATCCGAGGGCCTCACTA      | 70                 |
| NOTCH1-qPCR-F        | GAGGCGTGGCAGACTATGC      |                    |
| NOTCH1-qPCR-R        | CTTGTACTCCGTCAGCGTGA     | 140                |
| HES1-qPCR-F          | TCAACACGACACCCGGATAAAC   |                    |
| HES1-qPCR-R          | GCCGCGAGCTATCTTTCTTCA    | 153                |
| HEY1-qPCR-F          | GTTCGGCTCTAGGTTCCATGT    |                    |
| HEY1-qPCR-R          | CGTCGGCGCTTCTCAATTATTC   | 88                 |
| HEYL-qPCR-F          | GGAAGAAACGCAGAGGGATCA    |                    |
| HEYL-qPCR-R          | CAAGCGTCGCAATTCAGAAAG    | 77                 |
| <b>Mouse primers</b> |                          |                    |
| Notch1-qPCR-F        | TGAGACAGGCAACAGTGAAG     |                    |
| Notch1-qPCR-R        | CAGCATCTGAACGAGAGTATCG   | 146                |
| Hes1-qPCR-F          | CCAGCCAGTGTCAACACGA      |                    |
| Hes1-qPCR-R          | AATGCCGGGAGCTATCTTTCT    | 166                |
| Hey1-qPCR-F          | TGAATCCAGATGACCAGCTACTGT |                    |
| Hey1-qPCR-R          | TACTTTCAGACTCCGATCGCTTAC | 223                |
| Heyl-qPCR-F          | TCCTAGCCAGAGATTCAGTGTCAC |                    |
| Heyl-qPCR-R          | GTTTGTCTGCAACACCCTAGAGTG | 281                |
| Nanog-qPCR-F         | TCTTCCTGGTCCCCACAGTTT    |                    |
| Nanog-qPCR-R         | GCAAGAATAGTTCTCGGGATGAA  | 100                |
| Oct4-qPCR-F          | AGAGGATCACCTTGGGGTACA    |                    |
| Oct4-qPCR-R          | CGAAGCGACAGATGGTGGTC     | 96                 |
| Sox2-qPCR-F          | GCGGAGTGGAACTTTTGTCC     |                    |
| Sox2-qPCR-R          | CGGGAAGCGTGACTTATCCTT    | 157                |
| Cd73-qPCR-F          | GGACATTTGACCTCGTCCAAT    |                    |
| Cd73-qPCR-R          | GGGCACTCGACACTTGGTG      | 191                |
| Cd90-qPCR-F          | TGCTCTCAGTCTTGCAAGGTG    |                    |
| Cd90-qPCR-R          | TGGATGGAGTTATCCTTGGTGTT  | 121                |
| Cd105-qPCR-F         | CCCTCTGCCATTACCCTG       |                    |
| Cd105-qPCR-R         | GTAACGTCACCTCACCCCTT     | 120                |
| Ppargc1a-qPCR-F      | TATGGAGTGACATAGAGTGTGCT  |                    |
| Ppargc1a-qPCR-R      | CCACTTCAATCCACCCAGAAAG   | 143                |
| Pparg-qPCR-F         | GGAAGACCACTCGCATTCTT     |                    |
| Pparg-qPCR-R         | GTAATCAGCAACCATTGGGTCA   | 121                |
| Fabp4-qPCR-F         | AAGGTGAAGAGCATCATAACCCT  |                    |
| Fabp4-qPCR-R         | TCACGCCTTTCATAACACATTCC  | 133                |
| Cebpa-qPCR-F         | CAAGAACAGCAACGAGTACCG    |                    |
| Cebpa-qPCR-R         | GTCAGTGGTCAACTCCAGCAC    | 124                |
| ND1-qPCR-F           | CTAGCAGAAACAAACCGGGC     |                    |
| ND1-qPCR-R           | CCGGCTGCGTATTCTACGTT     | 86                 |
| HK2-qPCR-F           | GCCAGCCTCTCCTGATTTTAGTGT |                    |
| HK2-qPCR-R           | GGGAACACAAAAGACCTCTTCTGG | 116                |

F: Forward; R: Reverse
